# Supplementary material for: Effects of temperature and polyols on the ciprofloxacin hydrochloride-mediated micellization of sodium dodecyl sulfate
Source: PubMed Central journal article supplement — RSC Adv. 2020 Apr 9;10(25):14531–41. doi: 10.1039/d0ra00213e (PMC9051905; doi:10.1039/d0ra00213e), 2020-04-09
Supplement: RA-010-D0RA00213E-s001.pdf [file RA-010-D0RA00213E-s001.pdf]

1 **Supplementary materials**

2 **Effect of temperature and polyols on the drug (ciprofloxacin**  
3 **hydrochloride) mediated micellization of sodium dodecyl sulfate**

4  
5 Shamim Mahbub<sup>a,b</sup>, Sayma Akter<sup>a</sup>, Luthfunnessa<sup>a</sup>, Parul Akter<sup>a</sup>, Md. Anamul Hoque<sup>b</sup>, Malik  
6 Abdul Rub<sup>c,f</sup>, Dileep Kumar<sup>d,e,\*</sup>, Yousef G. Alghamdi<sup>c</sup>, Abdullah M. Asiri<sup>c,f</sup>, Huriya Džudžević-  
7 Čančar<sup>g</sup>

8  
9  
10  
11  
12  
13 \_\_\_\_\_  
14 *<sup>a</sup>Department of Chemistry & Physics, Gono Bishwabidyalay, Savar, Dhaka-1344, Bangladesh*

15 *<sup>b</sup>Department of Chemistry, Jahangirnagar University, Savar, Dhaka- 1342, Bangladesh*

16 *<sup>c</sup>Chemistry Department, Faculty of Science, King Abdulaziz University, Jeddah-21589, Saudi*  
17 *Arabia*

18 *<sup>d</sup>Division of Computational Physics, Institute for Computational Science, Ton Duc Thang*  
19 *University, Ho Chi Minh City, Vietnam*

20 *<sup>e</sup>Faculty of Applied Sciences, Ton Duc Thang University, Ho Chi Minh City, Vietnam*

21 *<sup>f</sup>Center of Excellence for Advanced Materials Research, King Abdulaziz University, Jeddah-*  
22 *21589, Saudi Arabia*

23 *<sup>g</sup>Department of Natural Science in Pharmacy, Faculty of Pharmacy, University of*  
24 *Sarajevo, Zmaja od Bosne 8, 71 000 Sarajevo, Bosnia and Herzegovina*

25 *E-mail: dileepkumar@tdtu.edu.vn; Tel: +84943720085*

1 **Table S1**2 The estimated values of A, B & C by regression analysis of least squares in different solvents.

| $C_{CFH}$<br>(mmol.kg <sup>-1</sup> ) | Water   |         |        | 10 mmol.kg <sup>-1</sup> glucose |         |        | 10 mmol.kg <sup>-1</sup> fructose |         |        |
|---------------------------------------|---------|---------|--------|----------------------------------|---------|--------|-----------------------------------|---------|--------|
|                                       | A       | B       | C      | A                                | B       | C      | A                                 | B       | C      |
| 0.00                                  | 64.2600 | -0.4246 | 0.0007 | 157.1600                         | -1.0818 | 0.0018 | 156.4100                          | -1.0749 | 0.0017 |
| 0.50                                  | 50.3850 | -0.3335 | 0.0005 | 97.1890                          | -0.6899 | 0.0011 | 126.6900                          | -0.8822 | 0.0014 |
| 1.00                                  | 33.5680 | -0.2242 | 0.0004 | 89.0720                          | -0.6385 | 0.0010 | 101.8600                          | -0.7200 | 0.0012 |
| 2.00                                  | 87.2780 | -0.5781 | 0.0009 | 78.5830                          | -0.5685 | 0.0009 | 97.0030                           | -0.6882 | 0.0011 |

3

4

5 **Table S2**

6 Enthalpy-entropy compensation parameters for SDS &amp; SDS+CFH mixture in different solvents

| $C_{CFH}$<br>(mmo.kg <sup>-1</sup> ) | Water                |        | 10 mmol.kg <sup>-1</sup> glucose |        | 10 mmol.kg <sup>-1</sup> fructose |        |
|--------------------------------------|----------------------|--------|----------------------------------|--------|-----------------------------------|--------|
|                                      | $\Delta H_m^{0,*}$   | $T_c$  | $\Delta H_m^{0,*}$               | $T_c$  | $\Delta H_m^{0,*}$                | $T_c$  |
|                                      | kJ.mol <sup>-1</sup> | K      | kJ.mol <sup>-1</sup>             | K      | kJ.mol <sup>-1</sup>              | K      |
| 0.00                                 | -34.09               | 325.10 | -36.01                           | 314.78 | -33.58                            | 301.33 |
| 0.50                                 | -5.60                | 288.16 | -33.08                           | 302.06 | -32.02                            | 301.30 |
| 1.00                                 | -5.82                | 344.88 | -30.83                           | 294.52 | -32.86                            | 318.04 |
| 2.00                                 | -6.70                | 297.82 | -31.26                           | 299.11 | -31.25                            | 303.59 |

14

15
